# Supplementary material for: Backbonding contributions to small molecule chemisorption in a metal–organic framework with open copper(i) centers
Source: Royal Society of Chemistry journal article supplement (doi:10.1039/d0sc06038k), 2020-12-18
Supplement: d0sc06038k1.pdf [file d0sc06038k1.pdf]

**Supporting Information:**

**Backbonding Contributions to Small Molecule  
Chemisorption in a Metal–Organic Framework  
with Open Copper(I) Centers**

Gregory M. Su,<sup>†,⊥</sup> Han Wang,<sup>‡,⊥</sup> Brandon R. Barnett,<sup>¶,§</sup> Jeffrey R. Long,<sup>¶,||,§</sup>  
David Prendergast,<sup>‡</sup> and Walter S. Drisdell<sup>\*,†</sup>

<sup>†</sup>*Chemical Sciences Division, Lawrence Berkeley National Laboratory, Berkeley, CA 94720,  
USA.*

<sup>‡</sup>*The Molecular Foundry, Lawrence Berkeley National Laboratory, Berkeley, CA 94720,  
USA.*

<sup>¶</sup>*Department of Chemistry, University of California, Berkeley, Berkeley, CA 94720, USA.*

<sup>§</sup>*Materials Science Division, Lawrence Berkeley National Laboratory, Berkeley, CA 94720,  
USA.*

<sup>||</sup>*Department of Chemical and Biomolecular Engineering, University of California,  
Berkeley, Berkeley, CA 94720, USA.*

<sup>⊥</sup>*These authors contributed equally to this work*

E-mail: [wdrisdell@lbl.gov](mailto:wdrisdell@lbl.gov)

## Beam damage

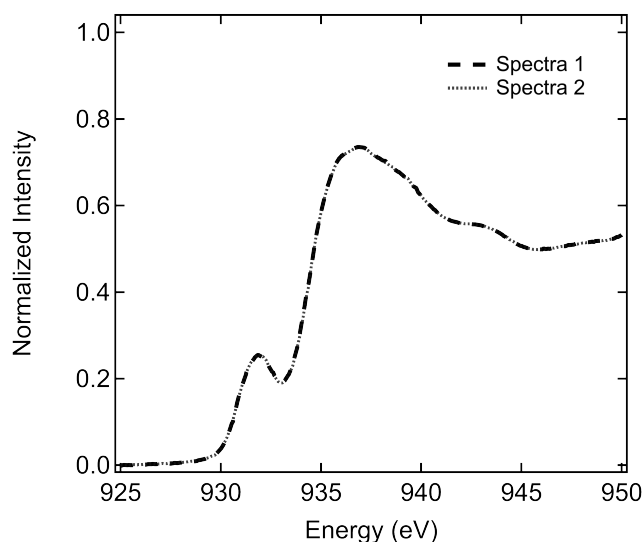

Figure S1: Two consecutive NEXAFS measurements taken on the same spot of activated (bare) Cu<sup>I</sup>-MFU-4l reveal nearly identical spectra, suggesting minimal beam damage.

## Cu<sup>I</sup>-MFU-4l geometry optimization and truncated cluster for NEXAFS calculations

Simulated NEXAFS spectra depend strongly on the MOF structure. In Cu<sup>I</sup>-MFU-4l, the Cu–ligand distance and angle will determine the corresponding peak position and line shape in a given spectrum. The fine structure of the calculated spectra depends on both the functional used and the MOF cluster structure. The functional used also influences geometry relaxation results. We tested different functionals, including B3LYP, PBE0, M06-2X, and  $\omega$ 98b-v. M06-2X gave optimal results for relaxing the MOF geometry and calculating the NEXAFS spectra with LR-TDDFT.

The full unit cell of bare Cu<sup>I</sup>-MFU-4l has over 600 atoms and a lattice constant of 31.22 Å at room temperature, which results in calculations that are computationally expensive. To reduce the computational difficulty, geometry relaxations and NEXAFS simulations were

performed on a representative cluster taken from the bulk MOF structure, which contains one Cu center, as shown in Figure S2.

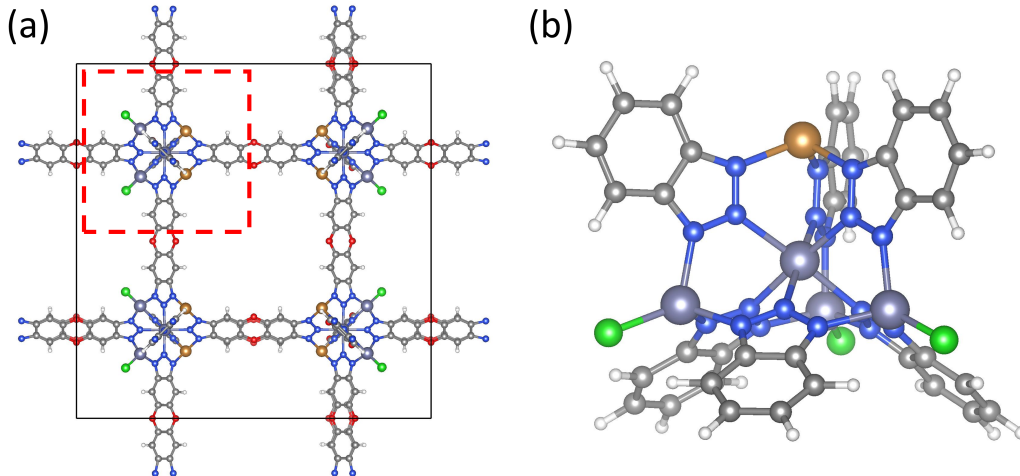

Figure S2: The unit cell of Cu<sup>I</sup>-MFU-4l is shown in (a) and the cluster structure cut from the red cubic region of the periodic MOF structure used for simulations is shown in (b). The grey, white, red, blue, orange, cyan and green spheres represent C, H, O, N, Cu, Zn, and Cl atoms, respectively.

**Table S1: The energy of the first LR-TDDFT root, the electron-hole pair used in the MOM calculation, and the corresponding total energy difference between the MOM calculation and the ground state calculation, respectively.  $\alpha$  and  $\beta$  represent the spin up and spin down channels, respectively.**

|                                        | MOF                         | O <sub>2</sub> side-on (T <sub>1</sub> ) | O <sub>2</sub> end-on (T <sub>1</sub> ) | CO                          | N <sub>2</sub>              | H <sub>2</sub>              | C <sub>2</sub> H <sub>4</sub> | NH <sub>3</sub>             |
|----------------------------------------|-----------------------------|------------------------------------------|-----------------------------------------|-----------------------------|-----------------------------|-----------------------------|-------------------------------|-----------------------------|
| $\epsilon_{LR-TDDFT}^{1st\ root}$ (eV) | 937.4981                    | 930.1682                                 | 936.4594                                | 938.1185                    | 938.6164                    | 939.3351                    | 937.5931                      | 938.7795                    |
| MOM                                    | $\alpha 28 \rightarrow 290$ | $\beta 28 \rightarrow 292$               | $\beta 28 \rightarrow 291$              | $\alpha 28 \rightarrow 293$ | $\alpha 28 \rightarrow 295$ | $\alpha 28 \rightarrow 287$ | $\alpha 28 \rightarrow 294$   | $\alpha 27 \rightarrow 295$ |
| $E_{MOM} - E_{GS}$ (eV)                | 941.6636                    | 939.4004                                 | 940.2748                                | 941.7865                    | 942.3894                    | 943.1808                    | 941.8823                      | 942.1562                    |

## Predicting the Cu-H<sub>2</sub> distance

Figure S3 presents the experimental H<sub>2</sub> dosed spectrum of Cu<sup>I</sup>-MFU-4l with six different computed spectra wherein the adsorbed H<sub>2</sub> distance decreases from 2 to 1.5 Å. With decreasing distance between H<sub>2</sub> and the metal site, an additional peak clearly grows in at 938 eV. By analyzing the contributing orbital, we find that it originates from the LUMO+1 orbital of H<sub>2</sub>. Since the H<sub>2</sub> LUMO+1 is more localized compared with the LUMO state, strong

coupling occurs only at short Cu–H<sub>2</sub> distances. Since the peak at 938 eV is not visible in the experimental spectrum, the Cu–H<sub>2</sub> distance is expected to be more than 1.7 Å.

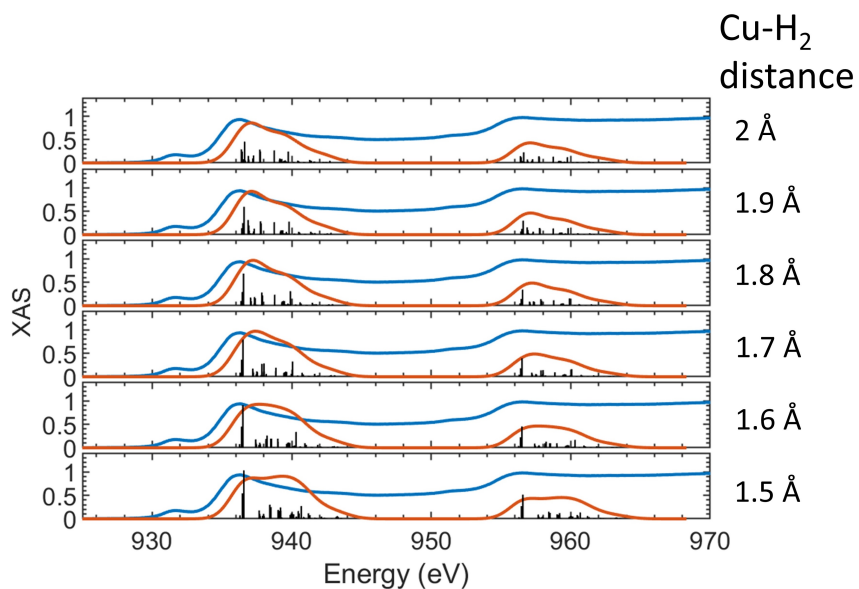

Figure S3: Experimental (blue) and simulated (red) NEXAFS spectra for H<sub>2</sub> adsorbed in Cu<sup>I</sup>-MFU-4l. The simulated spectra were generated by varying the Cu–H<sub>2</sub> distance from 1.5 to 2 Å. A second peak at approximately 938 eV increases in intensity as the Cu–H<sub>2</sub> distance decreases.



# Correlating NEXAFS transition and isolated guest LUMO energies

The NEXAFS backbonding peak intensity depends largely on the binding energy of a given adsorbate at the open copper site. Since the coupling between ligand and Cu varies with different adsorbates, the peak position is highly dependent on the LUMO energy of the isolated ligand molecule (Figure S4).

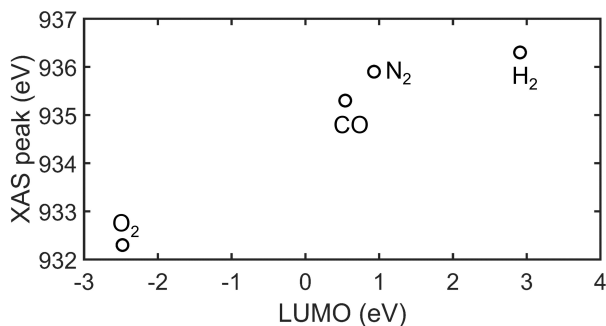

Figure S4: The dependence of the peak position (energy) of the new NEXAFS feature that emerges upon ligand chemisorption as a function of the LUMO energy of the isolated ligand small molecule.

Table S2: Panel A: (Upper rows) The calculated energies and orbital plots of the HOMO and LUMO of the free O<sub>2</sub>, CO, N<sub>2</sub>, H<sub>2</sub>, C<sub>2</sub>H<sub>4</sub>, and NH<sub>3</sub> molecules, respectively. (Lower rows) The binding energy, experimental XAS peak energy, and the predicted orbital projection ( $C^2$ ) of the adsorbed molecules.  $C^2$  values were calculated using Equation 6 as given in the main text. The def2-SVPD basis was used for the calculations. The isosurface for the orbital wavefunction plot is 0.05. The Cu 3d orbital is assumed to be -9.9 eV. Panel B: The LUMO+1 to LUMO+4 orbitals of free NH<sub>3</sub>.

Panel A

|                     | O <sub>2</sub>                                                                     | CO                                                                                 | N <sub>2</sub>                                                                     | H <sub>2</sub>                                                                      | C <sub>2</sub> H <sub>4</sub>                                                        | NH <sub>3</sub>                                                                      |
|---------------------|------------------------------------------------------------------------------------|------------------------------------------------------------------------------------|------------------------------------------------------------------------------------|-------------------------------------------------------------------------------------|--------------------------------------------------------------------------------------|--------------------------------------------------------------------------------------|
| HOMO (eV)           | -10.91                                                                             | -12.22                                                                             | -13.93                                                                             | -13.33                                                                              | -9.10                                                                                | -9.17                                                                                |
|                     | 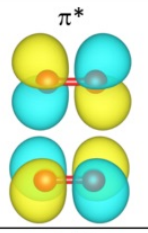  |   |   |   |   |   |
| LUMO (eV)           | -1.58                                                                              | 0.54                                                                               | 0.95                                                                               | 3.18                                                                                | 1.03                                                                                 | 1.52                                                                                 |
|                     |  |  |  |  |  |  |
| Binding energy (eV) | -0.48                                                                              | -0.80                                                                              | -0.43                                                                              | -0.34                                                                               | -0.85                                                                                | -0.95                                                                                |
| Exp. peak (eV)      | 932.3                                                                              | 935.3                                                                              | 935.9                                                                              | 936.3                                                                               | 935.4                                                                                |                                                                                      |
| $C^2$               | 0.06                                                                               | 0.08                                                                               | 0.04                                                                               | 0.03                                                                                | 0.08                                                                                 | 0.08                                                                                 |

Panel B

| NH <sub>3</sub> | Energy (eV) | Orbital plot                                                                          |
|-----------------|-------------|---------------------------------------------------------------------------------------|
| LUMO+1          | 3.61        | 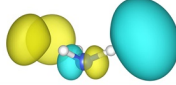 |
| LUMO+2          | 3.61        |  |
| LUMO+3          | 5.30        |  |
| LUMO+4          | 5.30        |  |

## *In situ* gas dosing NEXAFS spectra

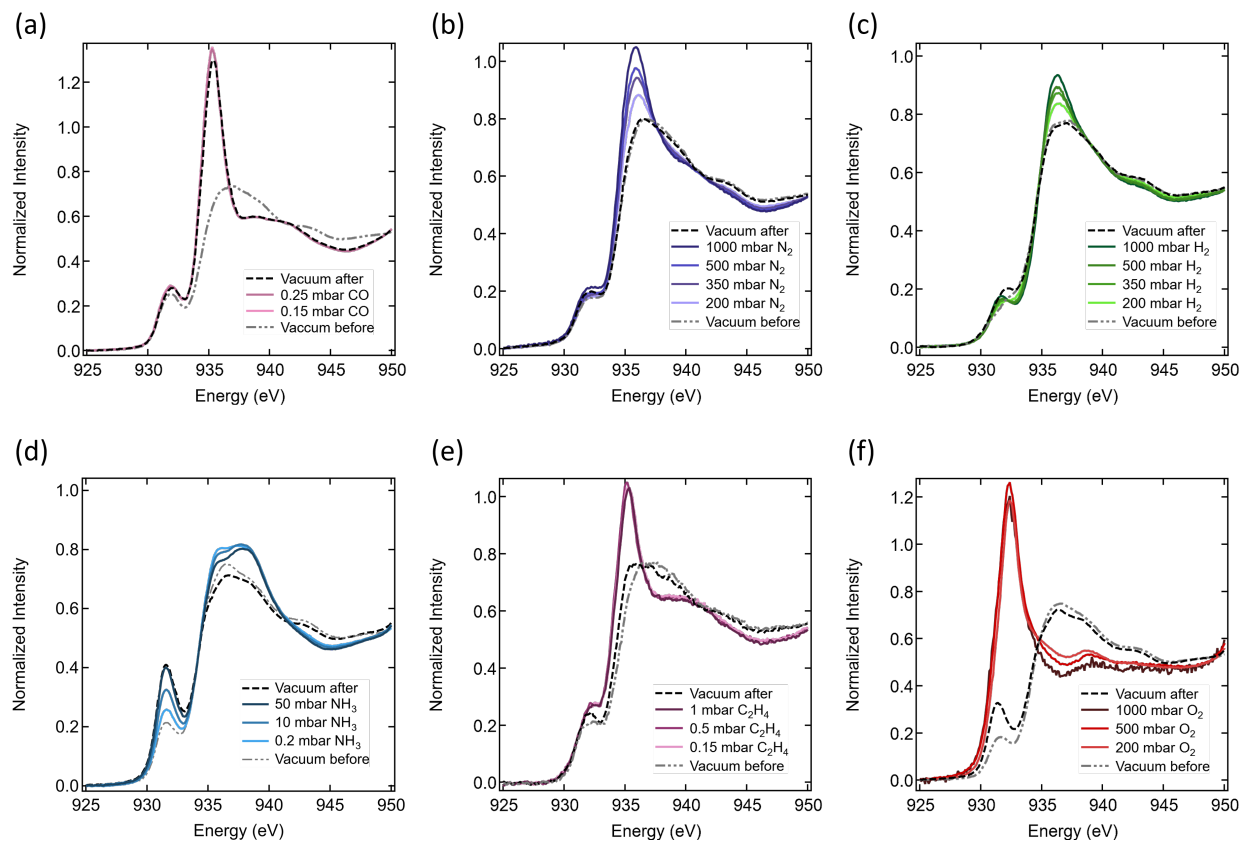

Figure S5: Room temperature *in situ* experimental Cu L-edge NEXAFS data for Cu<sup>I</sup>-MFU-4l dosed with (a) CO, (b) N<sub>2</sub>, (c) H<sub>2</sub>, (d) NH<sub>3</sub>, (e) C<sub>2</sub>H<sub>4</sub>, or (f) O<sub>2</sub>.

## Gas adsorption isotherms

Gas adsorption isotherms were collected on a Micromeritics ASAP 2020 or 3Flex gas sorption analyzer. In a typical measurement, fully activated  $\text{Cu}^{\text{I}}$ -MFU-4l (0.05-0.10 g) that had been stored in an argon-filled glovebox was loaded into a glass tube and capped with a Transeal. The tube was connected to the instrument and briefly heated to 180 °C to confirm that no significant off-gassing occurred. The tube was then submersed in a Julabo F-25 circulating isothermal water bath. Free space measurements were performed using UHP-grade He (99.999% ) at the analysis temperature. Oil-free vacuum pumps and oil-free pressure regulators were used for all measurements to prevent contamination of the samples during evacuation or of the feed gases during isotherm measurements. All gases used for isotherm measurements were rated as UHP-grade (99.999% purity) with the exception of CO (99.9%) and  $\text{C}_2\text{H}_4$  (99.90%). Note that the theoretical concentration of open  $\text{Cu}^+$  sites based off of the framework molecular formula<sup>S1</sup> is approximately 1.7 mmol/g, although isotherm measurements indicated that samples exhibited approximately 1.4 mmol/g of  $\text{Cu}^+$  sites available for chemisorption.

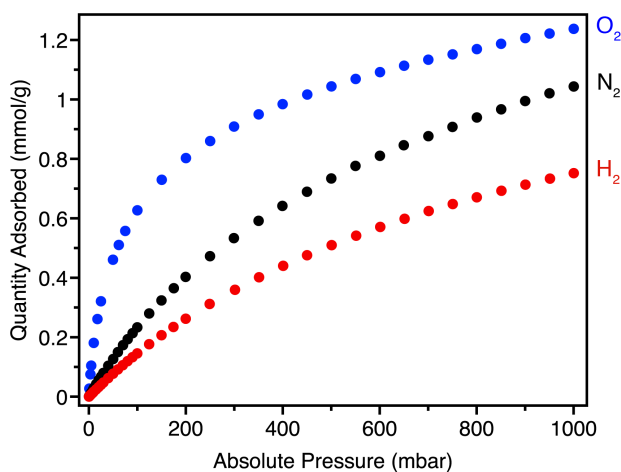

Figure S6: Oxygen ( $\text{O}_2$ , blue circles), nitrogen ( $\text{N}_2$ , black circles), and hydrogen ( $\text{H}_2$ , red circles) isotherms for  $\text{Cu}^{\text{I}}$ -MFU-4l at 25 °C.

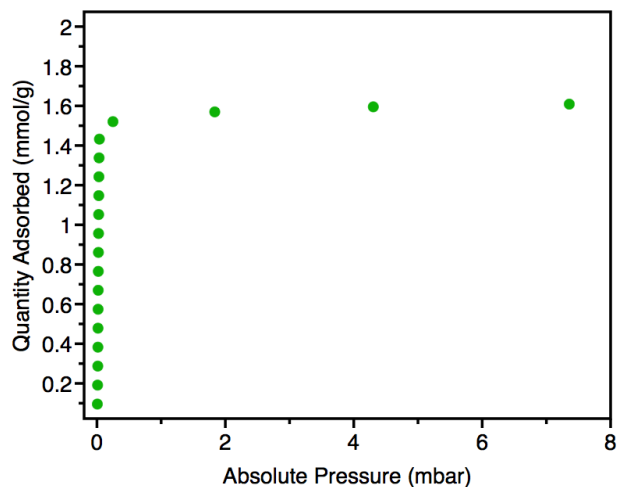

Figure S7: Carbon monoxide (CO) isotherm for the Cu<sup>I</sup>-MFU-4l framework measured at 25 °C.

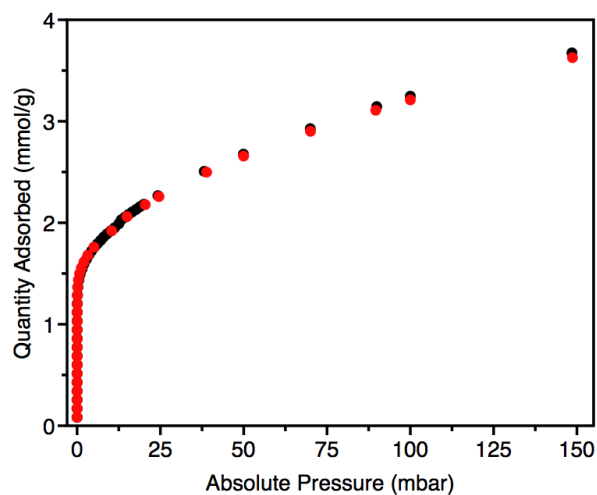

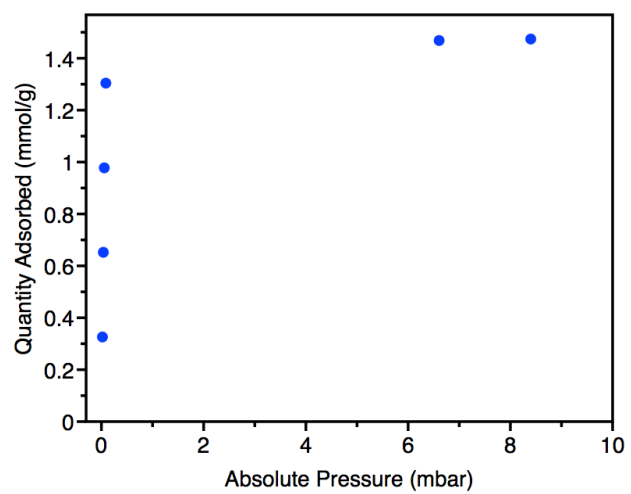

Figure S9: Ethylene ( $C_2H_4$ ) isotherm for the  $Cu^I$ -MFU-4l framework measured at 25 °C.

## Correlating peak intensity with binding strength

Molecular orbital energies of the framework-ligand complex can be estimated based on a two-level Hamiltonian model.

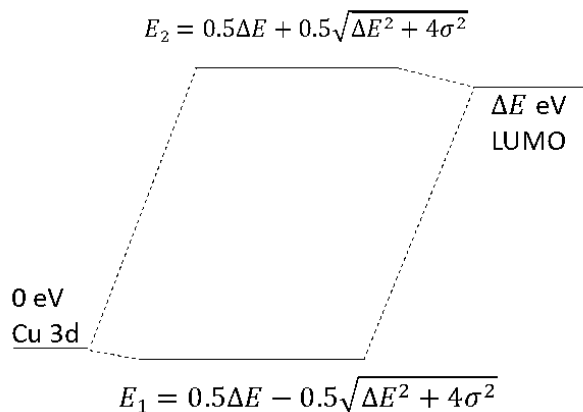

Figure S10: Schematic of the two level model representing the framework and guest molecule interaction.

$$H = \begin{bmatrix} \Delta E & \sigma \\ \sigma & 0 \end{bmatrix} \begin{matrix} |LUMO\rangle \\ |Cu_{3d}\rangle \end{matrix} \quad (1)$$

$\Delta E$ : energy difference between Molecular LUMO and Cu 3d orbital

$\sigma$ : the coupling between molecular LUMO level and Cu 3d orbital

By diagonalizing the Hamiltonian matrix, we have the bonding state:

$$V_1 = \begin{bmatrix} 0.5\Delta E - 0.5\sqrt{\Delta E^2 + 4\sigma^2} \\ \sigma \end{bmatrix} \quad (2)$$

and  $E_1 = 0.5\Delta E - 0.5\sqrt{\Delta E^2 + 4\sigma^2}$

Antibonding state:

$$V_2 = \begin{bmatrix} 0.5\Delta E + 0.5\sqrt{\Delta E^2 + 4\sigma^2} \\ \sigma \end{bmatrix} \quad (3)$$

$$E_2 = 0.5\Delta E + 0.5\sqrt{\Delta E^2 + 4\sigma^2}$$

Cu projection in antibonding state:

$$C^2 = \frac{\sigma^2}{\sigma^2 + (0.5\Delta E + 0.5\sqrt{\Delta E^2 + 4\sigma^2})^2} \quad (4)$$

If  $\Delta E \gg \sigma$  Then

$$C^2 = \frac{\sigma^2}{\sigma^2 + (0.5\Delta E + 0.5\sqrt{\Delta E^2 + 4\sigma^2})^2} = \frac{\sigma^2}{\Delta E^2 \left( 2\frac{\sigma^2}{\Delta E^2} + 0.5 + 0.5\sqrt{1 + \frac{4\sigma^2}{\Delta E^2}} \right)} \approx \frac{\sigma^2}{\Delta E^2} \quad (5)$$

So the coupling strength determines the XAS peak intensity.

Binding energy :

$$E_b = 0.5\sqrt{\Delta E^2 + 4\sigma^2} - 0.5\Delta E = 0.5\Delta E \left( \sqrt{1 + 4\frac{\sigma^2}{\Delta E^2}} - 1 \right) \approx 0.5\Delta E \left( 1 + 2\frac{\sigma^2}{\Delta E^2} - 1 \right) \approx \frac{\sigma^2}{\Delta E} \quad (6)$$

Therefore, Cu projection  $C^2 \approx \frac{E_b}{\Delta E}$ .

This shows that the NEXAFS peak intensity of the MOF-guest complex is proportional to the binding energy. The NEXAFS peak intensity can therefore be used to determine the relative binding energies of different guest molecules, provided that the isolated guest molecules have similar LUMO energies. This observation can be more generally applied to analyze the X-ray absorption spectra of similar MOFs with adsorbed guests.



# Molecular orbital diagram of NH<sub>3</sub>-dosed Cu<sup>I</sup>-MFU-4l

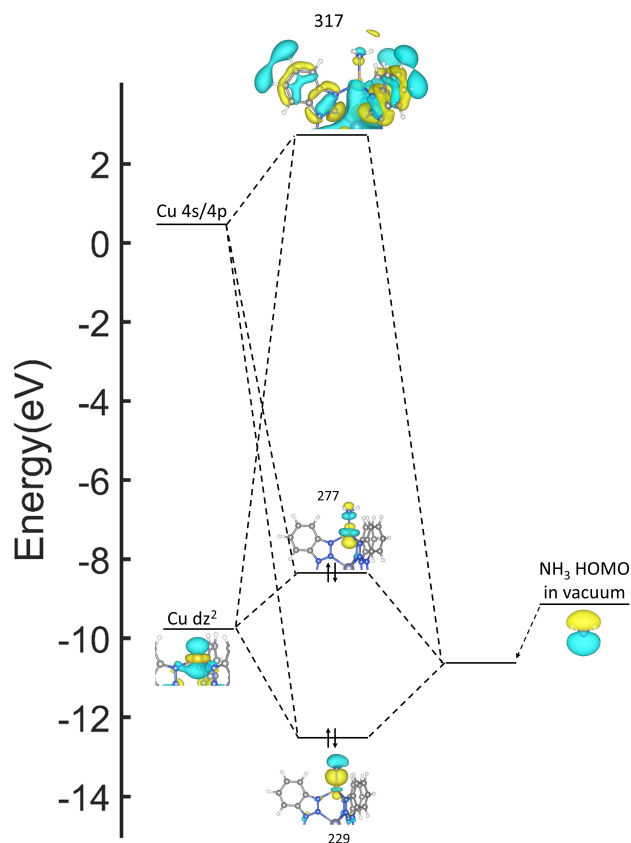

Figure S11: Molecular orbital diagram showing the primary  $\sigma$  donation interactions for NH<sub>3</sub>-dosed Cu<sup>I</sup>-MFU-4l based on DFT calculations. NEXAFS is not sensitive to these interactions, but instead probes weaker backbonding interactions with the NH<sub>3</sub> LUMO+1 and LUMO+2 orbitals, as shown in Figure 3b in the main text.

## Natural Bond Orbital charge analysis

**Table S3:** Calculated copper and ligand atom charges determined from NBO analysis (units of e).

| Cu <sup>I</sup> -MFU-4l | CO-dosed                | N <sub>2</sub> -dosed   | H <sub>2</sub> -dosed   | C <sub>2</sub> H <sub>4</sub> -dosed | NH <sub>3</sub> -dosed  | O <sub>2</sub> -dosed   |
|-------------------------|-------------------------|-------------------------|-------------------------|--------------------------------------|-------------------------|-------------------------|
|                         | Cu <sup>I</sup> -MFU-4l | Cu <sup>I</sup> -MFU-4l | Cu <sup>I</sup> -MFU-4l | Cu <sup>I</sup> -MFU-4l              | Cu <sup>I</sup> -MFU-4l | Cu <sup>I</sup> -MFU-4l |
| Cu: 0.889               | Cu: 0.906               | Cu: 0.909               | Cu: 0.907               | Cu: 0.967                            | Cu: 0.880               | Cu: 1.39                |
|                         | C: 0.425                | N: -0.101               | H: -0.008               | C: -0.523                            | N: -1.184               | O: -0.302               |
|                         | O: -0.459               | N: 0.087                | H: -0.012               | C: -0.505                            | H: 0.401                | O: -0.302               |
|                         |                         |                         |                         | H: 0.231                             | H: 0.409                |                         |
|                         |                         |                         |                         | H: 0.235                             | H: 0.409                |                         |
|                         |                         |                         |                         | H: 0.238                             |                         |                         |
|                         |                         |                         |                         | H: 0.236                             |                         |                         |

## Orientation and quantum state of O<sub>2</sub>-dosed Cu<sup>I</sup>-MFU-4l

Both singlet and triplet configurations of the O<sub>2</sub> molecule adsorbed on the MOF cluster were calculated. The adsorbed O<sub>2</sub> molecule was found to adopt two orientations, a bent end-on orientation (Figure S12a) and a side-on orientation (Figure S12b). The total energy of the triplet side-on and bent end-on O<sub>2</sub> are 1.5 and 1.4 eV lower than the corresponding singlet states, respectively. Therefore we exclude the singlet states as possible configurations. The triplet state side-on O<sub>2</sub> configuration has a lower total energy than the triplet state bent end-on configuration and the corresponding simulated spectrum is a better match to the experimental O<sub>2</sub>-dosed spectrum than the triplet end-on configuration (Figure S12c and d). However, the simulated spectrum of the triplet bent end-on configuration features a higher energy peak near 938 eV that may coincide with a weak feature in the experimental spectrum, suggesting a small proportion of O<sub>2</sub> may bind in a bent end-on fashion.

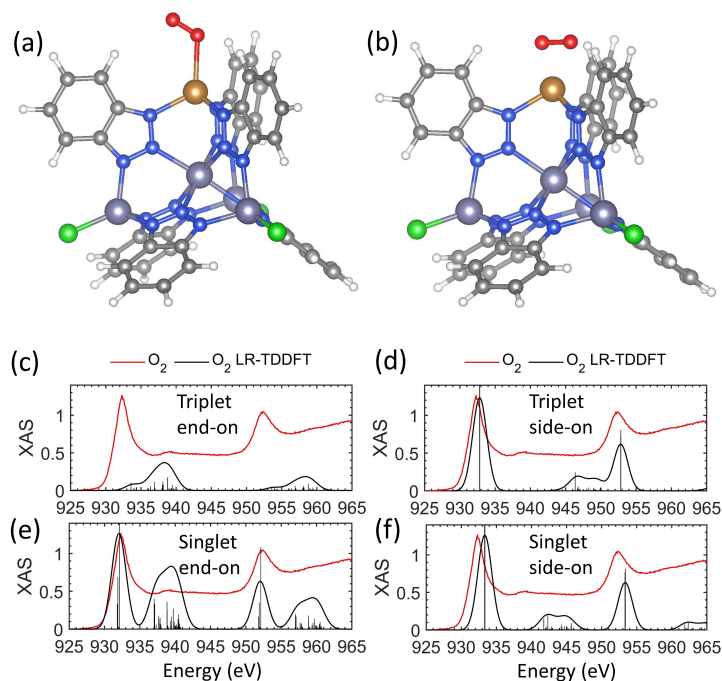

Figure S12: Cu<sup>I</sup>-MFU-4l with adsorbed O<sub>2</sub> bound in (a) a bent end-on orientation and (b) a side-on orientation. Simulated NEXAFS spectra of triplet (c) and singlet (e) bent end-on O<sub>2</sub> and triplet (d) and singlet (f) side-on O<sub>2</sub> (black traces) along with the experimental O<sub>2</sub>-dosed spectrum (red traces). The total energy of the triplet bent end-on structure is 0.23 eV higher than triplet side-on structure.

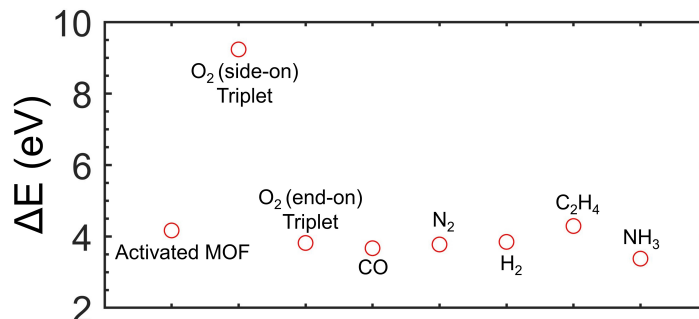

Figure S13: The MOM total energy correction with respect to the first LR-TDDFT root for Cu 2p excitations of Cu<sup>I</sup>-MFU-4l with various gases (triplet side-on O<sub>2</sub>, triplet bent end-on O<sub>2</sub>, CO, N<sub>2</sub>, H<sub>2</sub>, C<sub>2</sub>H<sub>4</sub> and NH<sub>3</sub>), defined as  $\Delta E = E_{MOM} - E_{GS} - \epsilon_{LR-TDDFT}^{1st\ root}$ . The most significant correction is applied to the side-on triplet O<sub>2</sub>, which would not align with experiment using LR-TDDFT alone.

## Effective charge on Cu

The effective charge on Cu is estimated with the total energy when a probe charge is placed near the bare MOF cluster.

The total energy of the system with a MOF cluster and the probe charge is

$$E = \frac{1}{4\pi\epsilon} \frac{q_1 q_2}{r}$$

where  $\epsilon = 8.854 \times 10^{12} C \cdot V^{-1} \cdot m^{-1}$  and  $e = 1.602 \times 10^{-19} C$ . The effective charge on Cu is

$$q_1 = \frac{E \cdot r}{14.4 q_2}$$

The unit of  $q$  is elementary charge  $e$ , the unit of the energy is eV and the unit of  $r$  is Å. When the probe charge is placed on along the Zn–Cu direction and 2 Å above the Cu atom, the calculated effective charge on Cu is 0.2  $e$ .

When the free gas molecules are in close proximity to a positive charge, an electrostatic shift lowers molecular orbital energies. Tables S4-S10 show this electrostatic shift for each gas studied. For all of these calculations, the distance between the point charge and the

molecule is the same as Cu–guest distance based on the relaxed geometry of each respective framework–guest complex.

**Table S4:** The orbital energies of H<sub>2</sub> in vacuum and in the electrostatic field of +0.2 e, +0.5 e and +1 e point charges. The H<sub>2</sub> geometry is obtained from the relaxed MOF–H<sub>2</sub> structure. The charge is placed at the position of Cu atom.

| H <sub>2</sub> orbital energy (eV) |         |        |        |        |
|------------------------------------|---------|--------|--------|--------|
| orbital index                      | neutral | +0.2e  | +0.5e  | +1e    |
| 1                                  | -13.22  | -14.72 | -17.01 | -20.98 |
| 2 LUMO                             | 2.91    | 1.80   | -0.14  | -4.71  |
| 3                                  | 5.03    | 3.29   | 0.33   | -3.54  |
| 4                                  | 5.03    | 3.84   | 1.82   | -1.47  |
| 5                                  | 6.31    | 5.14   | 3.40   | 0.52   |
| 6                                  | 8.76    | 7.40   | 5.36   | 2.10   |
| 7                                  | 8.76    | 7.62   | 5.93   | 3.07   |

**Table S5:** The orbital energies of CO in vacuum and in the electrostatic field of +0.2 e, +0.5 e and +1 e point charges. The charge is placed at the position of Cu atom.

| CO orbital energy (eV) |         |        |        |        |
|------------------------|---------|--------|--------|--------|
| orbital index          | neutral | +0.2e  | +0.5e  | +1e    |
| 5                      | -15.29  | -16.49 | -18.34 | -21.71 |
| 6                      | -15.29  | -16.49 | -18.34 | -21.71 |
| 7                      | -12.22  | -13.80 | -16.22 | -20.65 |
| 8 LUMO                 | 0.54    | -0.76  | -2.83  | -7.97  |
| 9                      | 0.54    | -0.76  | -2.83  | -6.50  |
| 10                     | 2.10    | 1.12   | -1.77  | -6.50  |

**Table S6: The orbital energies of C<sub>2</sub>H<sub>4</sub> in vacuum and in the electrostatic field of +0.2 e, +0.5 e and +1 e point charges. The charge is placed at the position of Cu atom.**

| C <sub>2</sub> H <sub>4</sub> orbital energy (eV) |         |        |        |        |
|---------------------------------------------------|---------|--------|--------|--------|
| orbital index                                     | neutral | +0.2e  | +0.5e  | +1e    |
| 5                                                 | -14.61  | -15.76 | -17.52 | -20.63 |
| 6                                                 | -13.12  | -14.29 | -16.08 | -19.27 |
| 7                                                 | -11.37  | -12.49 | -14.20 | -17.22 |
| 8                                                 | -9.01   | -10.34 | -12.44 | -16.16 |
| 9 LUMO                                            | 0.87    | -0.33  | -2.23  | -5.55  |
| 10                                                | 1.41    | 0.41   | -1.39  | -5.25  |

**Table S7: The orbital energies of N<sub>2</sub> in vacuum and in the electrostatic field of +0.2 e, +0.5 e and +1 e point charges. The charge is placed at the position of Cu atom.**

| N <sub>2</sub> orbital energy (eV) |         |        |        |        |
|------------------------------------|---------|--------|--------|--------|
| orbital index                      | neutral | +0.2e  | +0.5e  | +1e    |
| 4                                  | -17.12  | -18.34 | -20.27 | -23.78 |
| 5                                  | -14.78  | -15.92 | -17.66 | -20.82 |
| 6                                  | -14.78  | -15.92 | -17.66 | -20.79 |
| 7                                  | -13.93  | -15.16 | -17.01 | -20.19 |
| 8 LUMO                             | 0.93    | -0.24  | -2.04  | -6.61  |
| 9                                  | 0.93    | -0.24  | -2.04  | -5.22  |

**Table S8: The orbital energies of NH<sub>3</sub> in vacuum and in the electrostatic field of +0.2 e, +0.5 e and +1 e point charges. The charge is placed at the position of Cu atom.**

| NH <sub>3</sub> orbital energy (eV) |         |        |        |        |
|-------------------------------------|---------|--------|--------|--------|
| orbital index                       | neutral | +0.2e  | +0.5e  | +1e    |
| 3                                   | -14.42  | -15.62 | -17.52 | -20.93 |
| 4                                   | -14.39  | -15.59 | -17.50 | -20.90 |
| 5                                   | -9.20   | -10.61 | -12.84 | -16.84 |
| 6 LUMO                              | 1.50    | 0.44   | -1.39  | -5.47  |
| 7                                   | 3.62    | 2.72   | 1.33   | -1.82  |
| 8                                   | 3.62    | 2.72   | 1.33   | -1.14  |

**Table S9:** The orbital energies of side-on O<sub>2</sub> in vacuum, and in the electrostatic field of +0.2 e, +0.5 e and +1 e point charges. The charge is placed at the position of Cu atom.

| O <sub>2</sub> side-on orbital energy (eV) |         |              |        |              |        |              |        |             |
|--------------------------------------------|---------|--------------|--------|--------------|--------|--------------|--------|-------------|
|                                            | neutral |              | +0.2e  |              | +0.5e  |              | +1e    |             |
| orbital index                              | up      | down         | up     | down         | up     | down         | up     | down        |
| 6                                          | -17.82  | -14.01       | -19.21 | -15.51       | -21.33 | -17.82       | -25.03 | -21.85      |
| 7                                          | -17.36  | -14.01       | -18.72 | -15.40       | -20.79 | -17.50       | -24.41 | -21.14      |
| 8                                          | -11.81  | -2.48 (LUMO) | -13.22 | -3.89 (LUMO) | -15.43 | -6.07 (LUMO) | -19.24 | -9.80(LUMO) |
| 9                                          | -11.78  | -2.48        | -13.17 | -3.81        | -15.29 | -5.85        | -18.97 | -9.42       |
| 10                                         | 1.61    | 1.74         | 0.68   | 0.84         | -2.23  | -1.80        | -8.16  | -7.48       |

**Table S10:** The orbital energies of bent end-on O<sub>2</sub> in vacuum and in the electrostatic field of +0.2 e, +0.5 e and +1 e point charge. The charge is placed at the position of Cu atom.

| O <sub>2</sub> end-on orbital energy (eV) |         |             |        |             |        |             |        |             |
|-------------------------------------------|---------|-------------|--------|-------------|--------|-------------|--------|-------------|
|                                           | neutral |             | +0.2e  |             | +0.5e  |             | +1e    |             |
| orbital index                             | up      | down        | up     | down        | up     | down        | up     | down        |
| 6                                         | -18.64  | -14.99      | -19.73 | -16.11      | -21.39 | -17.80      | -24.25 | -20.74      |
| 7                                         | -17.82  | -14.99      | -18.91 | -16.08      | -20.60 | -17.71      | -23.48 | -20.57      |
| 8                                         | -10.94  | -1.61(LUMO) | -12.05 | -2.72(LUMO) | -13.74 | -4.52(LUMO) | -16.68 | -8.03(LUMO) |
| 9                                         | -10.94  | -1.61       | -12.03 | -2.67       | -13.69 | -4.30       | -16.57 | -7.13       |
| 10                                        | 1.80    | 1.93        | 0.63   | 0.73        | -1.85  | -1.80       | -6.56  | -6.26       |

## References

- (S1) FitzGerald, S. A.; Mukasa, D.; Rigdon, K. H.; Zhang, N.; Barnett, B. R. Hydrogen Isotope Separation within the Metal–Organic Framework Cu(I)-MFU-4l. *J. Phys. Chem. C* **2019**, *123*, 30427–30433.
